# Supplementary material for: Flavored Tobacco Sales Restrictions Reduce Tobacco Product Availability and Retailer Advertising
Source: MDPI journal article supplement (doi:10.3390/ijerph19063455), 2022-03-15
Supplement: s1 [file s1]

Supplemental Table S1. Flavored Tobacco Sales Policies by City, Alameda and San Francisco Counties

| City          | 2015<br>(N) | 2019-20<br>(N) | Enacted/Modified | Policy Details                                                                                                                                 |
|---------------|-------------|----------------|------------------|------------------------------------------------------------------------------------------------------------------------------------------------|
| Hayward*      | 20          | 13             | 7/7/2014         | Restricted flavored tobacco sales for new tobacco licenses only; stores already selling tobacco were exempted                                  |
| San Francisco | 137         | 103            | 7/21/2018        | Terminated sales of all flavored tobacco products, including menthol                                                                           |
| Alameda       | 3           | 8              | 7/1/2019         |                                                                                                                                                |
| Albany        | 1           | 0              | 10/15/2019       |                                                                                                                                                |
| Fremont       | 9           | 6              | 12/31/2019       |                                                                                                                                                |
| Livermore     | 8           | 8              | 1/1/2020         |                                                                                                                                                |
| San Leandro   | 15          | 13             | 8/5/2018         | Terminated sales of all flavored tobacco products, <b>except</b> menthol                                                                       |
| Berkeley      | 0           | 6              | 2017/2020        | <b>2017:</b> No flavored tobacco sales within 600 feet of schools; <b>April 1, 2020:</b> Termination of all flavored tobacco sales             |
| Oakland       | 66          | 59             | 2018/2020        | <b>2018:</b> Termination of flavored tobacco sales, except in stores with $\geq 60\%$ tobacco sales; <b>May 12, 2020:</b> Eliminated exception |
| Dublin        | 2           | 4              | 3/14/2020        | Terminated sales of all flavored tobacco products, including menthol                                                                           |
| Castro Valley | 7           | 3              | 9/6/2020         |                                                                                                                                                |
| San Lorenzo   | 3           | 1              | 9/6/2020         |                                                                                                                                                |
| Sunol         | 0           | 1              | 9/6/2020         |                                                                                                                                                |
| Pleasanton    | 3           | 3              | 1/1/2021         |                                                                                                                                                |
| Hayward*      | 20          | 13             | 1/14/2021        |                                                                                                                                                |
| Newark        | 9           | 11             |                  | No policy as of June 2021                                                                                                                      |
| Emeryville    | 1           | 0              |                  |                                                                                                                                                |
| Union City    | 5           | 3              |                  |                                                                                                                                                |
